# Supplementary figures and images for: Quality improvement for reducing utilization drift in hypoxic-ischemic encephalopathy management
Source: publisher site journal article supplement (doi:10.1515/jpm-2020-0095), 2020-11-03

Supplemental Figure 1

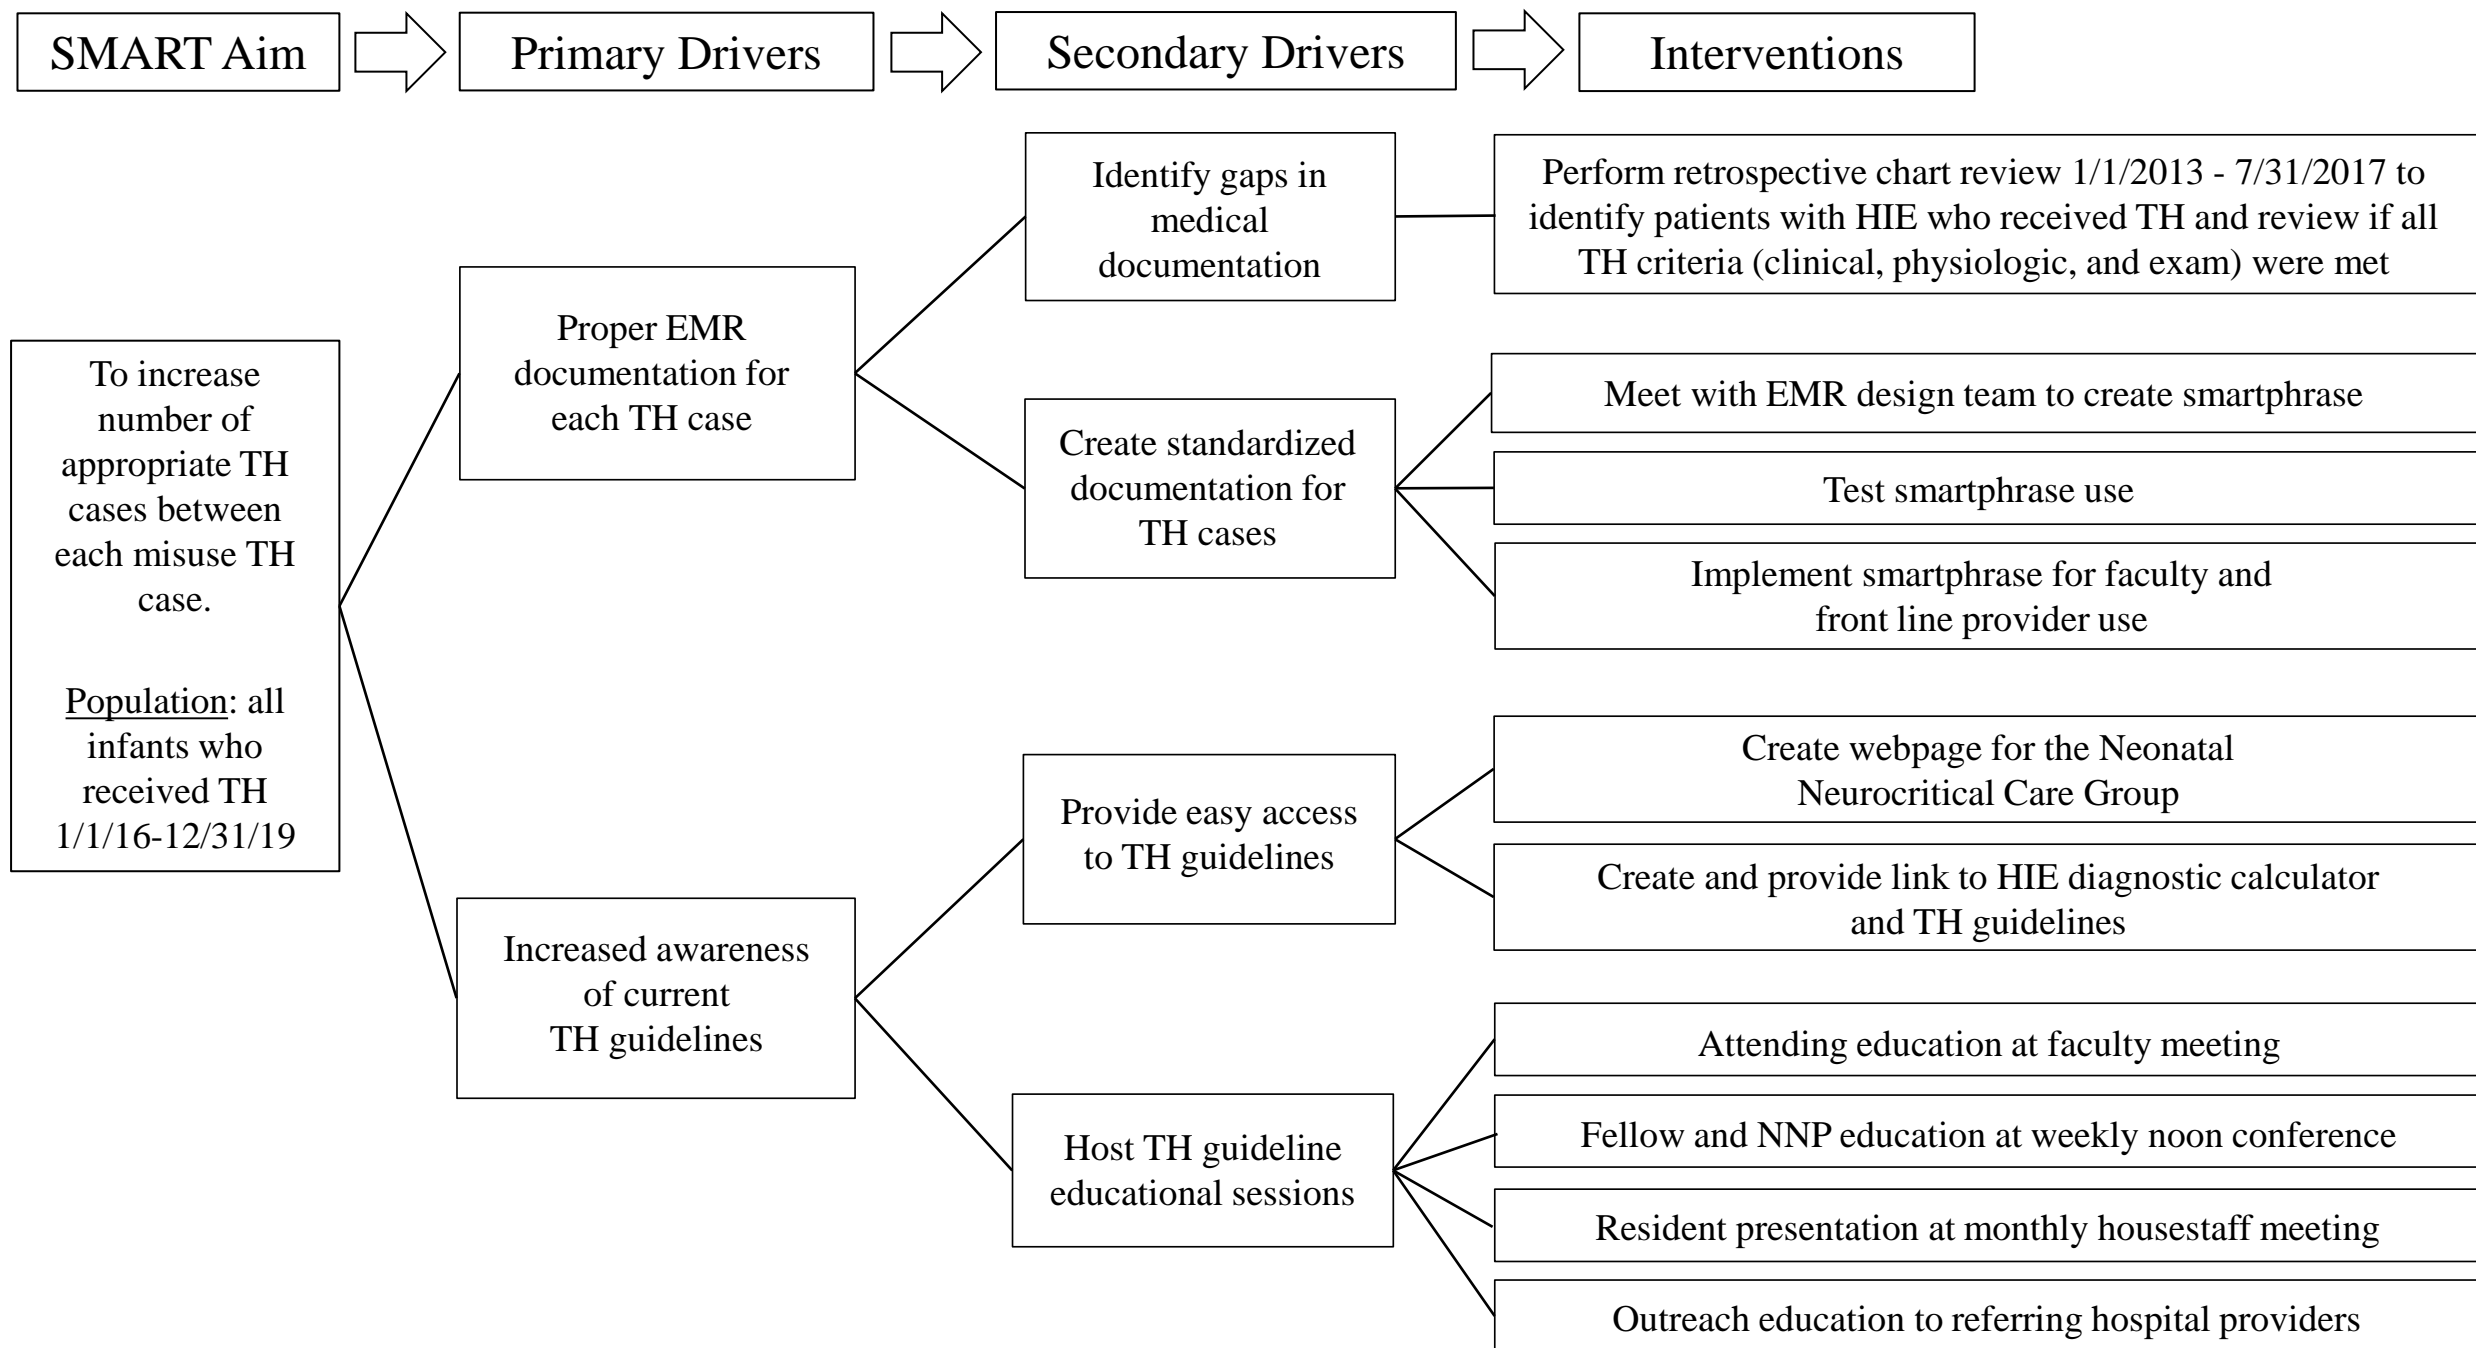

Supplement: Supplementary file 1 [file j_jpm-2020-0095_suppl.pdf]
